# Supplementary material for: Compartmentalization of the Edinburgh Human Metabolic Network
Source: Springer Nature journal article supplement (doi:10.1186/1471-2105-11-393), 2010-07-22
Supplement: 12859_2009_3850_MOESM7_ESM.pdf [file 12859_2009_3850_MOESM7_ESM.pdf]

Mitochondria

Mitochondria

M1

R1

M2

R2

M3

R3

M4

uncertain

R6

M5

R4

M6

R5

M7

Component I

Component II
