# Supplementary material for: Compartmentalization of the Edinburgh Human Metabolic Network
Source: Springer Nature journal article supplement (doi:10.1186/1471-2105-11-393), 2010-07-22

## Phytanic acid peroxisomal oxidation

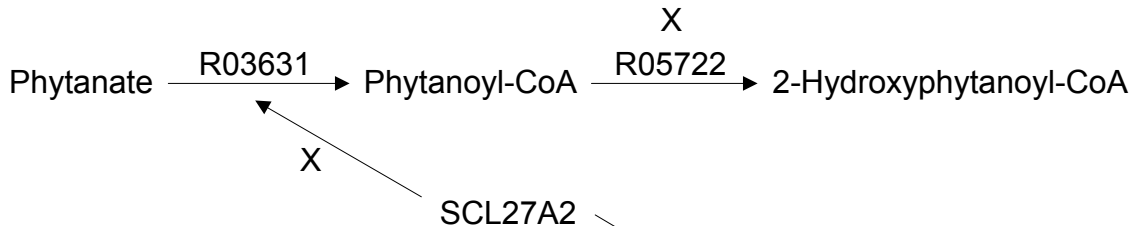

## Bile acid biosynthesis

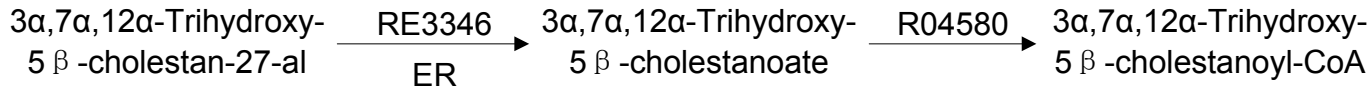

Supplement: 12859_2009_3850_MOESM8_ESM.pdf [file 12859_2009_3850_MOESM8_ESM.pdf]
